# Supplementary material
Source: Springer Nature journal article supplement (https://www.springermedizin.de/resource/supplementary/13054_2010_8530_MOESM1_ESM.pdf/9732174)
Supplement: MOESM1 [file 9732174]

**2207 patients admitted to medical ICU**

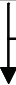

**385** with a history of DM, IFG or IGT

**1822**

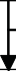

**274** died in hospital

**1548 screened**

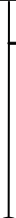

**443** excluded  
- 211 refused participation  
- 203 terminally ill  
- 29 receiving corticosteroids

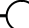

**669**  
NORMOGLYCAEMIA

**436**  
HYPERGLYCAEMIA

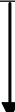

**669**

*started follow-up*

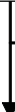

**360**

**76** excluded:  
- newly diagnosed DM, IGT or IFG

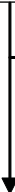

**102** died  
**154** discontinued follow-up  
**15** started steroid treatment

**389**  
49 IGF / IFG  
14 DM  
326 normoglycaemic

*finished follow-up*

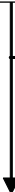

**66** died  
**93** discontinued follow-up  
**8** started steroid treatment

**193**  
47 IGF / IFG  
13 DM  
133 normoglycaemic
